# Supplementary material
Source: PubMed Central journal article supplement (PMC3272981)

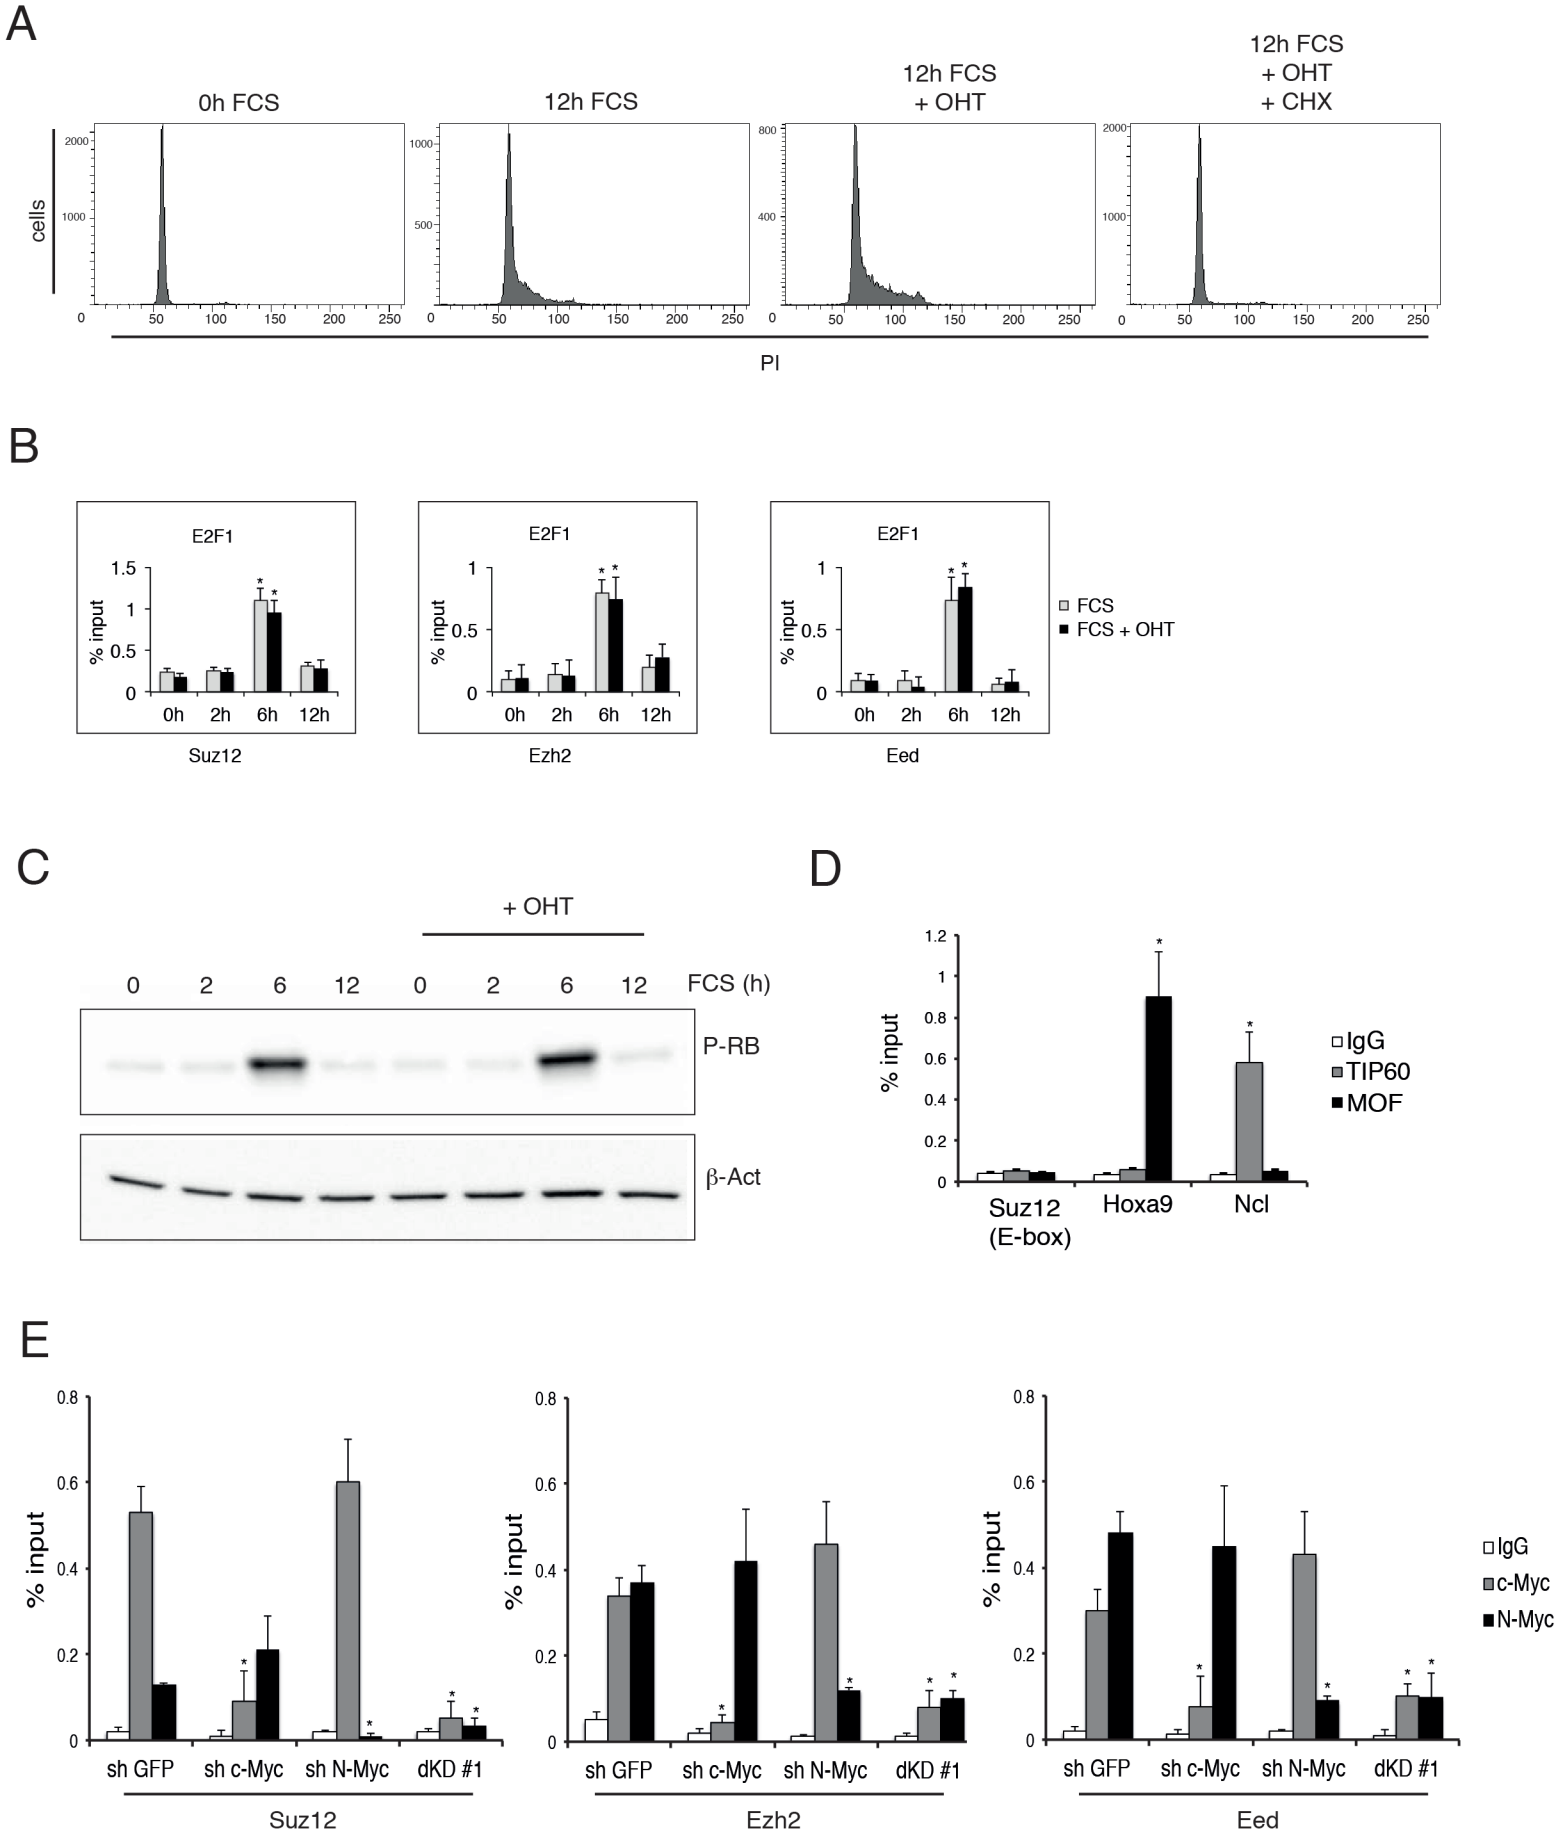

Fig. S1 Neri et al.

Supplement: supp_32.4.840_MCB6148-11_SF1.pdf [file supp_32.4.840_MCB6148-11_SF1.pdf]

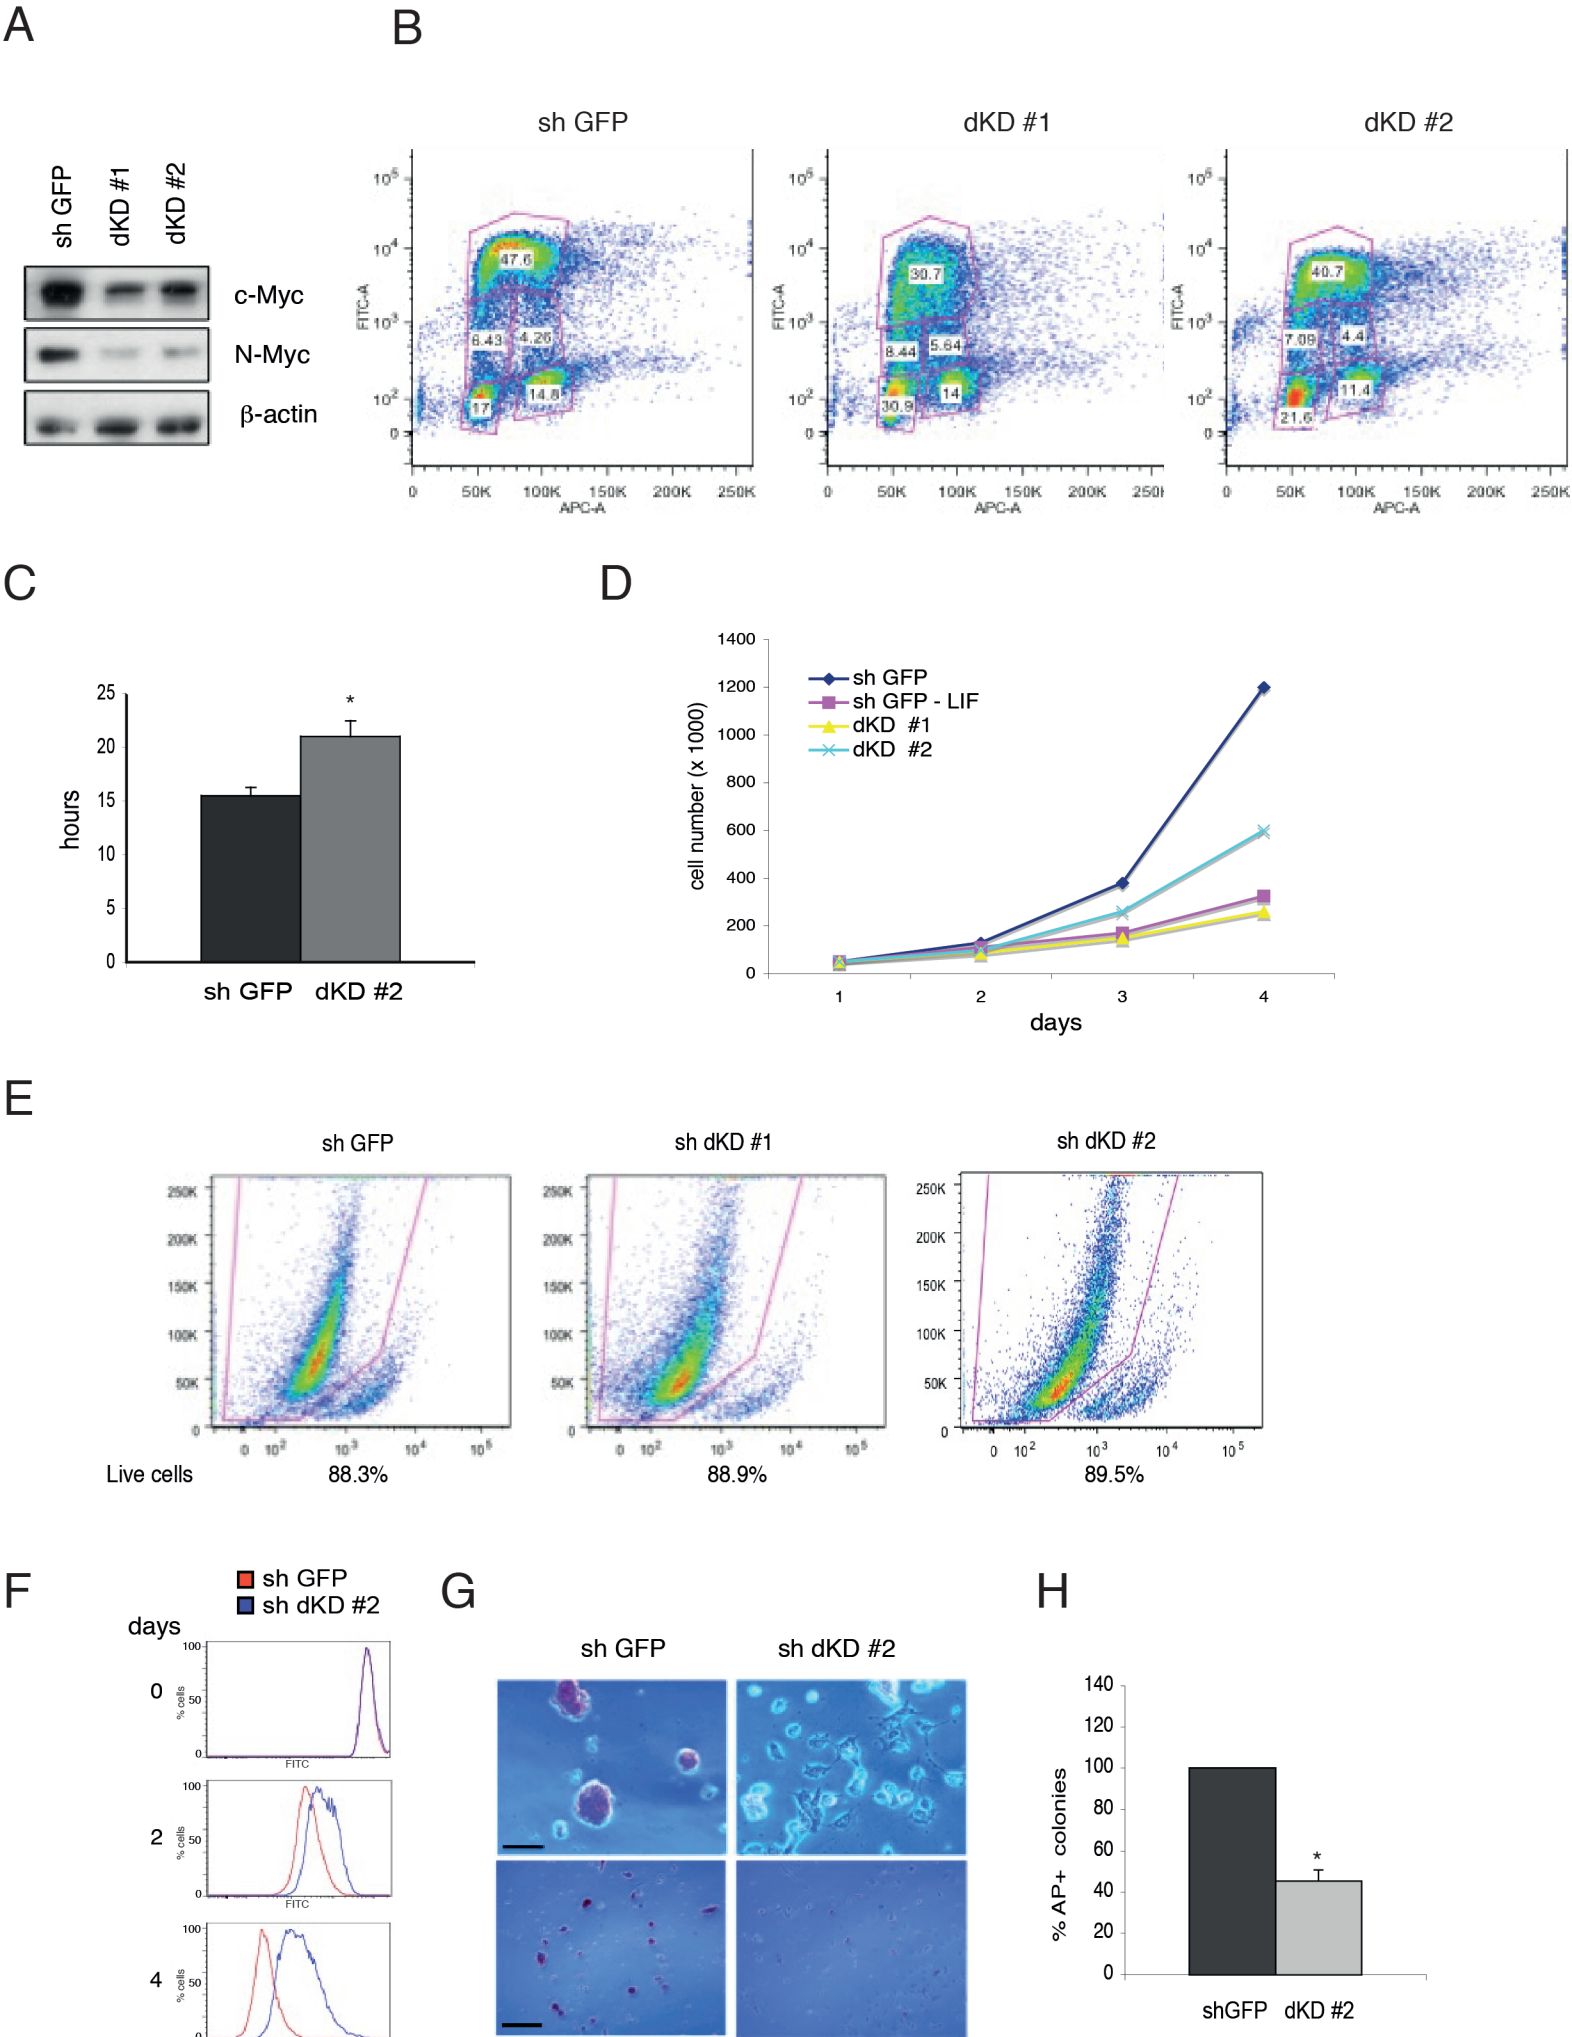

Fig. S2 Neri et al.

Supplement: supp_32.4.840_MCB6148-11_SF2.pdf [file supp_32.4.840_MCB6148-11_SF2.pdf]

A

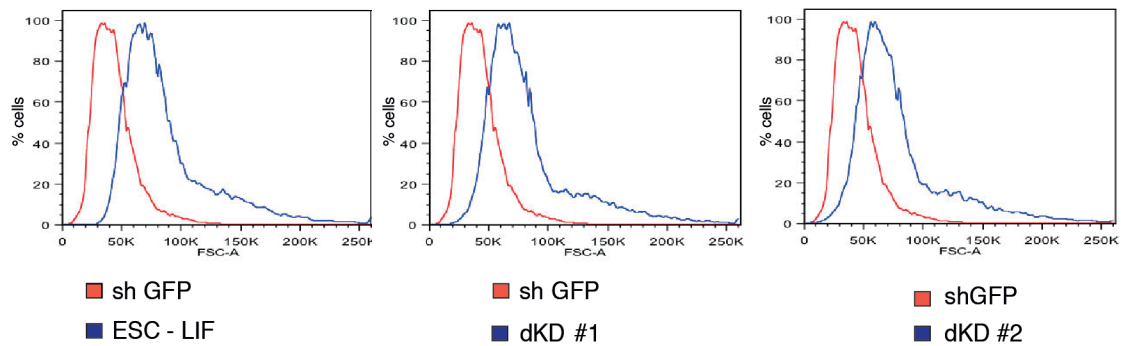

B

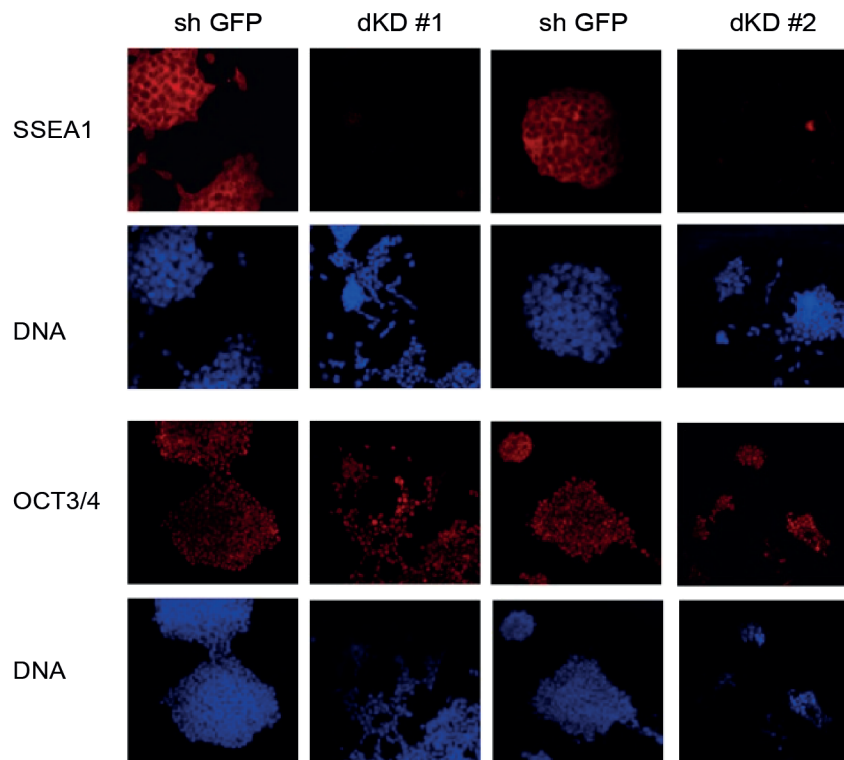

C

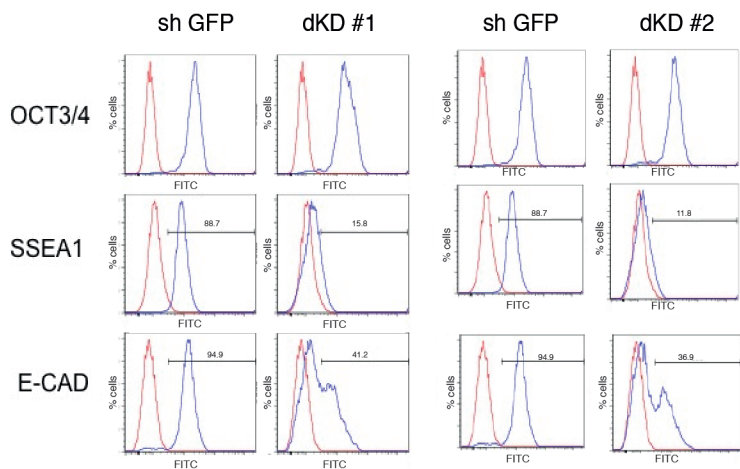

D

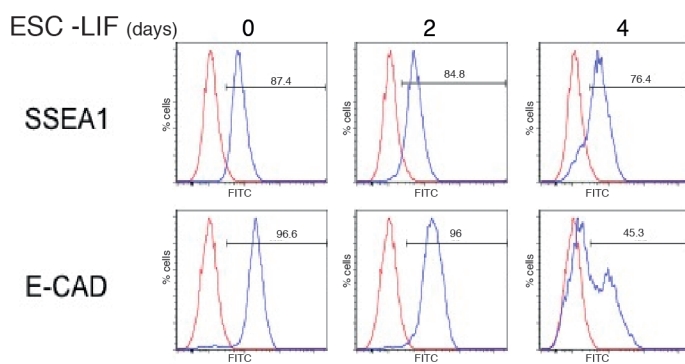

Fig. S3 Neri et al.

Supplement: supp_32.4.840_MCB6148-11_SF3.pdf [file supp_32.4.840_MCB6148-11_SF3.pdf]

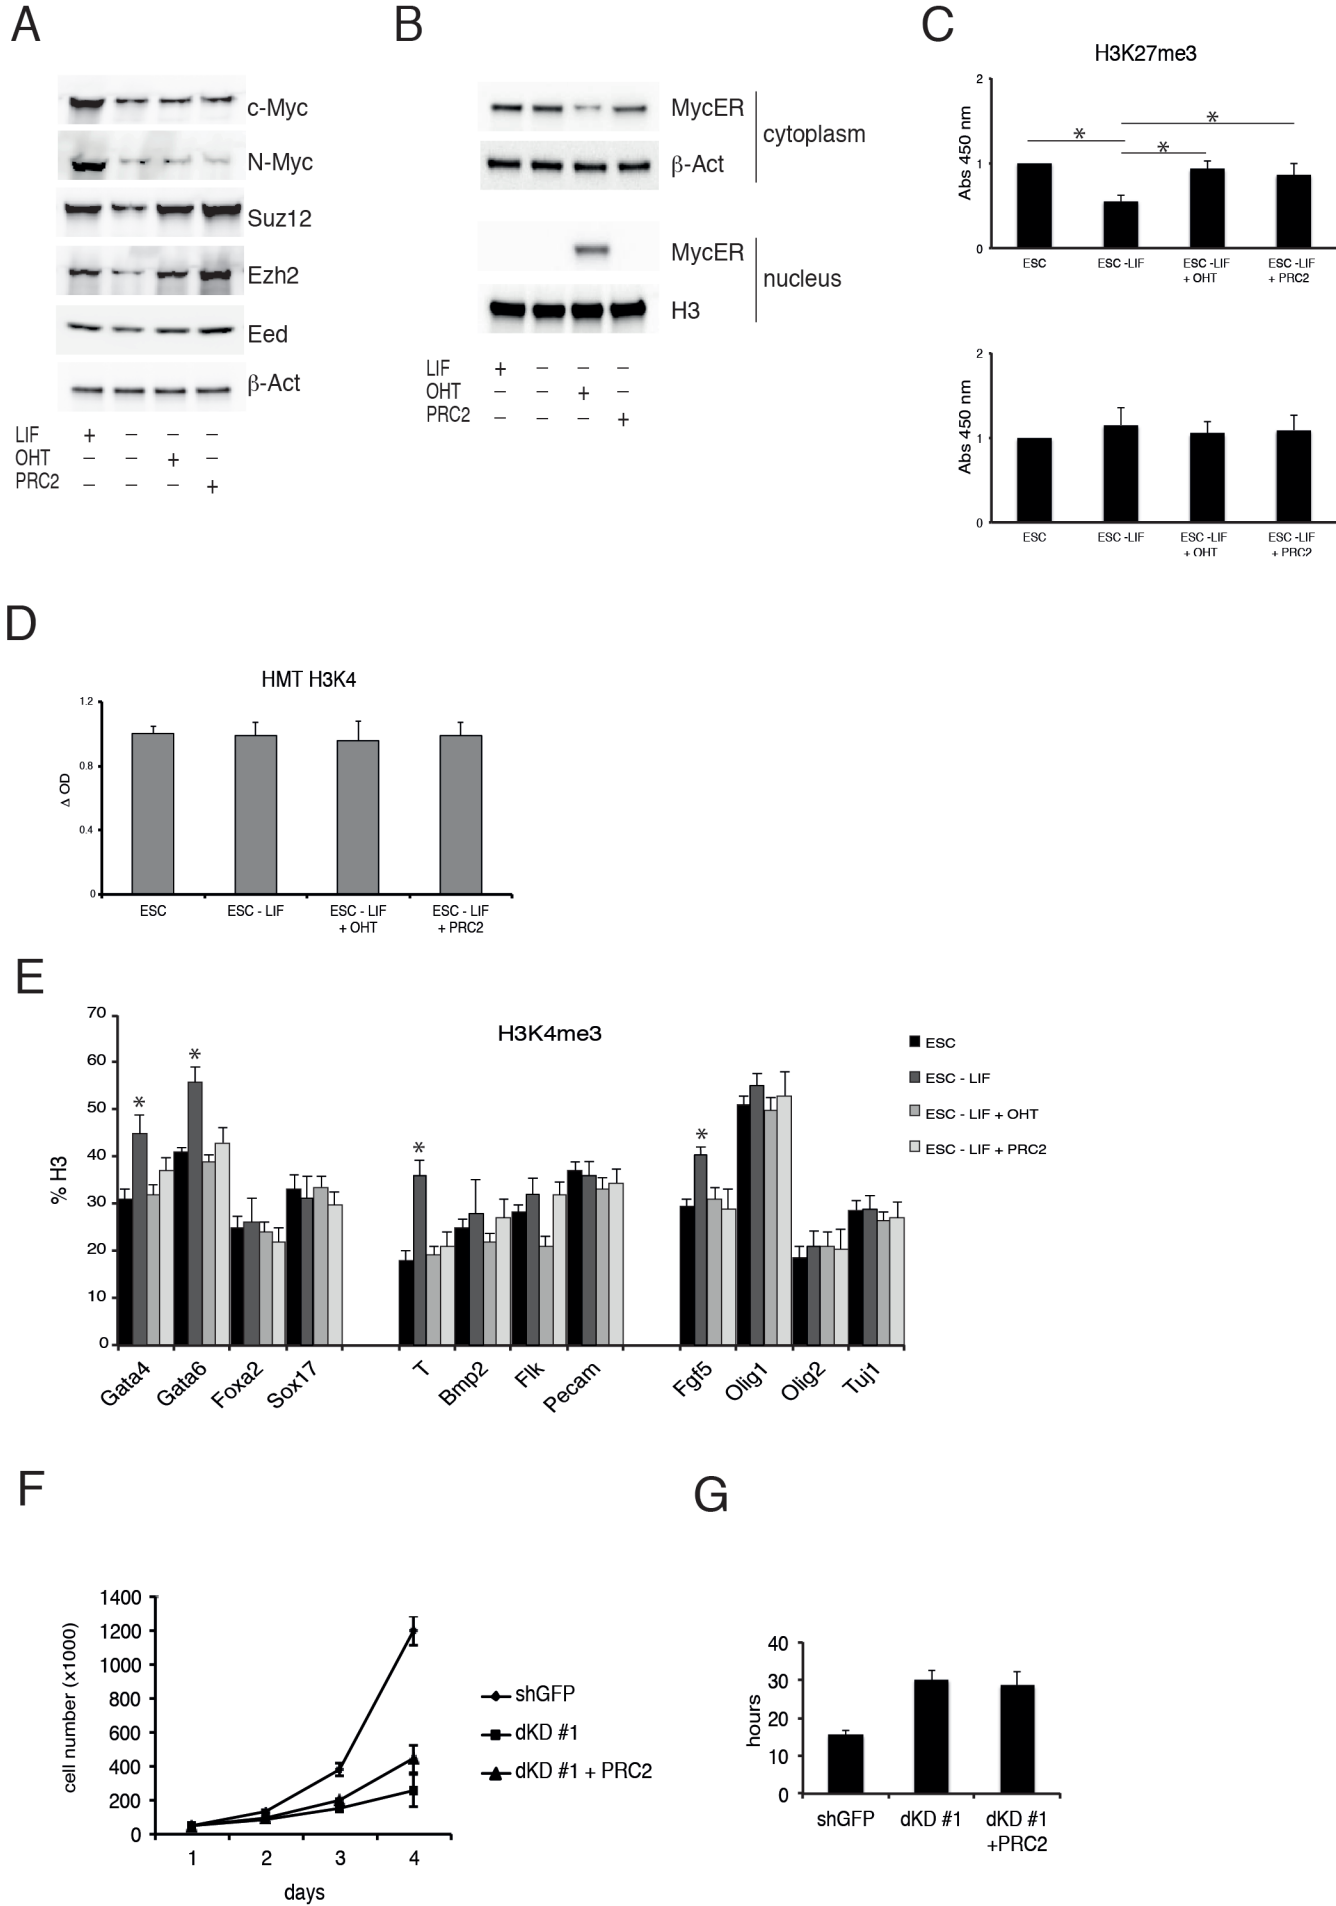

Fig.S4 Neri et al.

Supplement: supp_32.4.840_MCB6148-11_SF4.pdf [file supp_32.4.840_MCB6148-11_SF4.pdf]

A

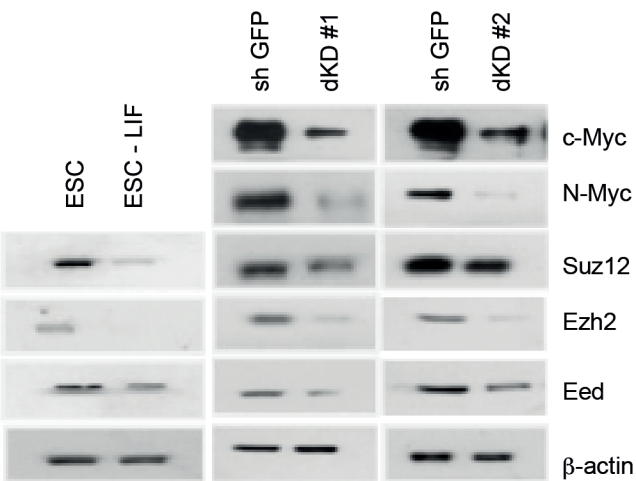

B

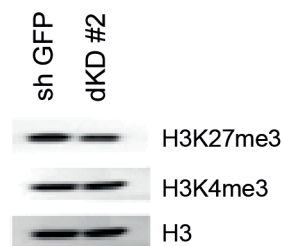

C

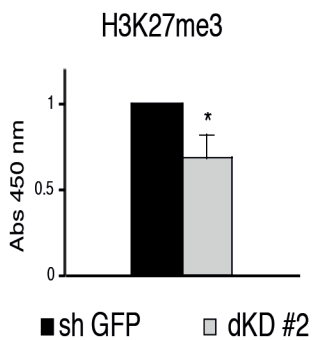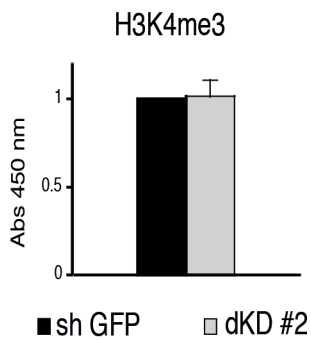

Supplement: supp_32.4.840_MCB6148-11_SF5.pdf [file supp_32.4.840_MCB6148-11_SF5.pdf]
